# Supplementary material for: Accuracy of IVUS-Based Machine Learning Segmentation Assessment of Coronary Artery Dimensions and Balloon Sizing
Source: PubMed Central journal article supplement — JACC Adv. 2023 Aug 22;2(7):100564. doi: 10.1016/j.jacadv.2023.100564 (PMC11198165; doi:10.1016/j.jacadv.2023.100564), 2023-08-22
Supplement: mmc1.pdf [file mmc1.pdf]

**Supplemental Figure 1. Bland-Altman Plot of Lumen and Vessel Areas between Expert Analysis and Machine Learning Model Segmentation, and between Two Cardiologists**

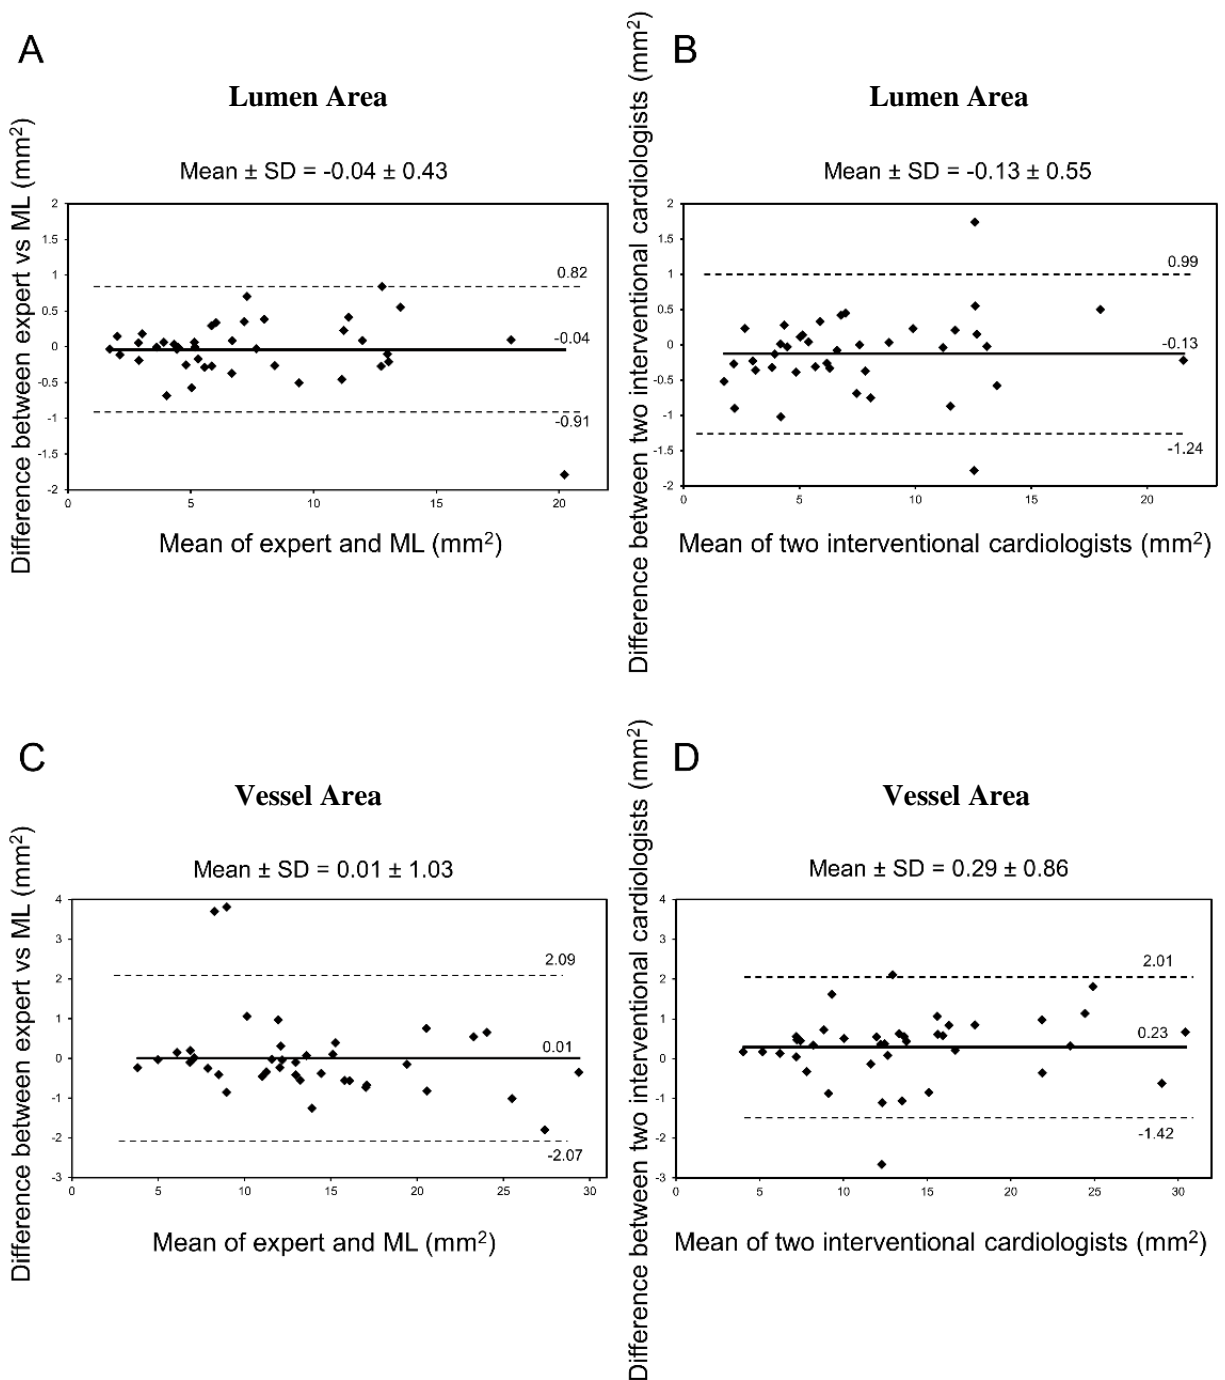

A) Bland-Altman plot of lumen area between expert analysis and machine learning model segmentation. B) Bland-Altman plot of lumen area between two cardiologists. C) Bland-Altman plot of vessel area between expert analysis and machine learning model segmentation. D) Bland-Altman plot of vessel area between two cardiologists. Mean difference is shown in solid line and  $\pm 2$ SD of the difference are shown in dotted lines. SD = standard deviation; ML = machine learning.

**Supplemental Figure 2. The Difference of Vessel Diameters between Expert Analysis and Machine Learning Model Segmentation of Vessel Area Stratified by Visible Vessel Border**

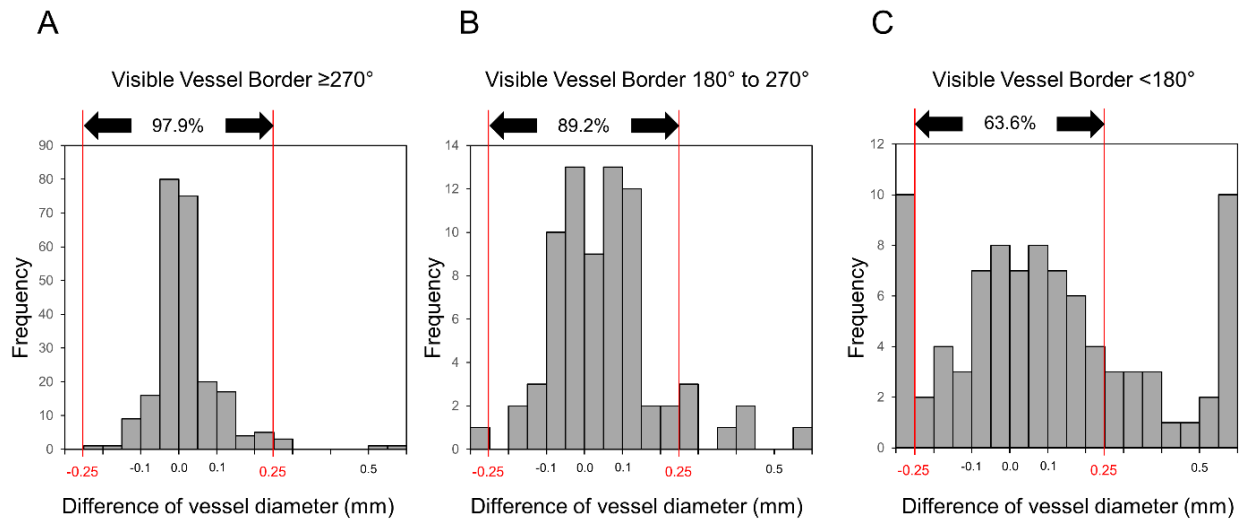

**Supplemental Figure 3. Lesion Level Comparison of Lumen and Vessel Areas between Expert Analysis and Machine Learning Model Segmentation**

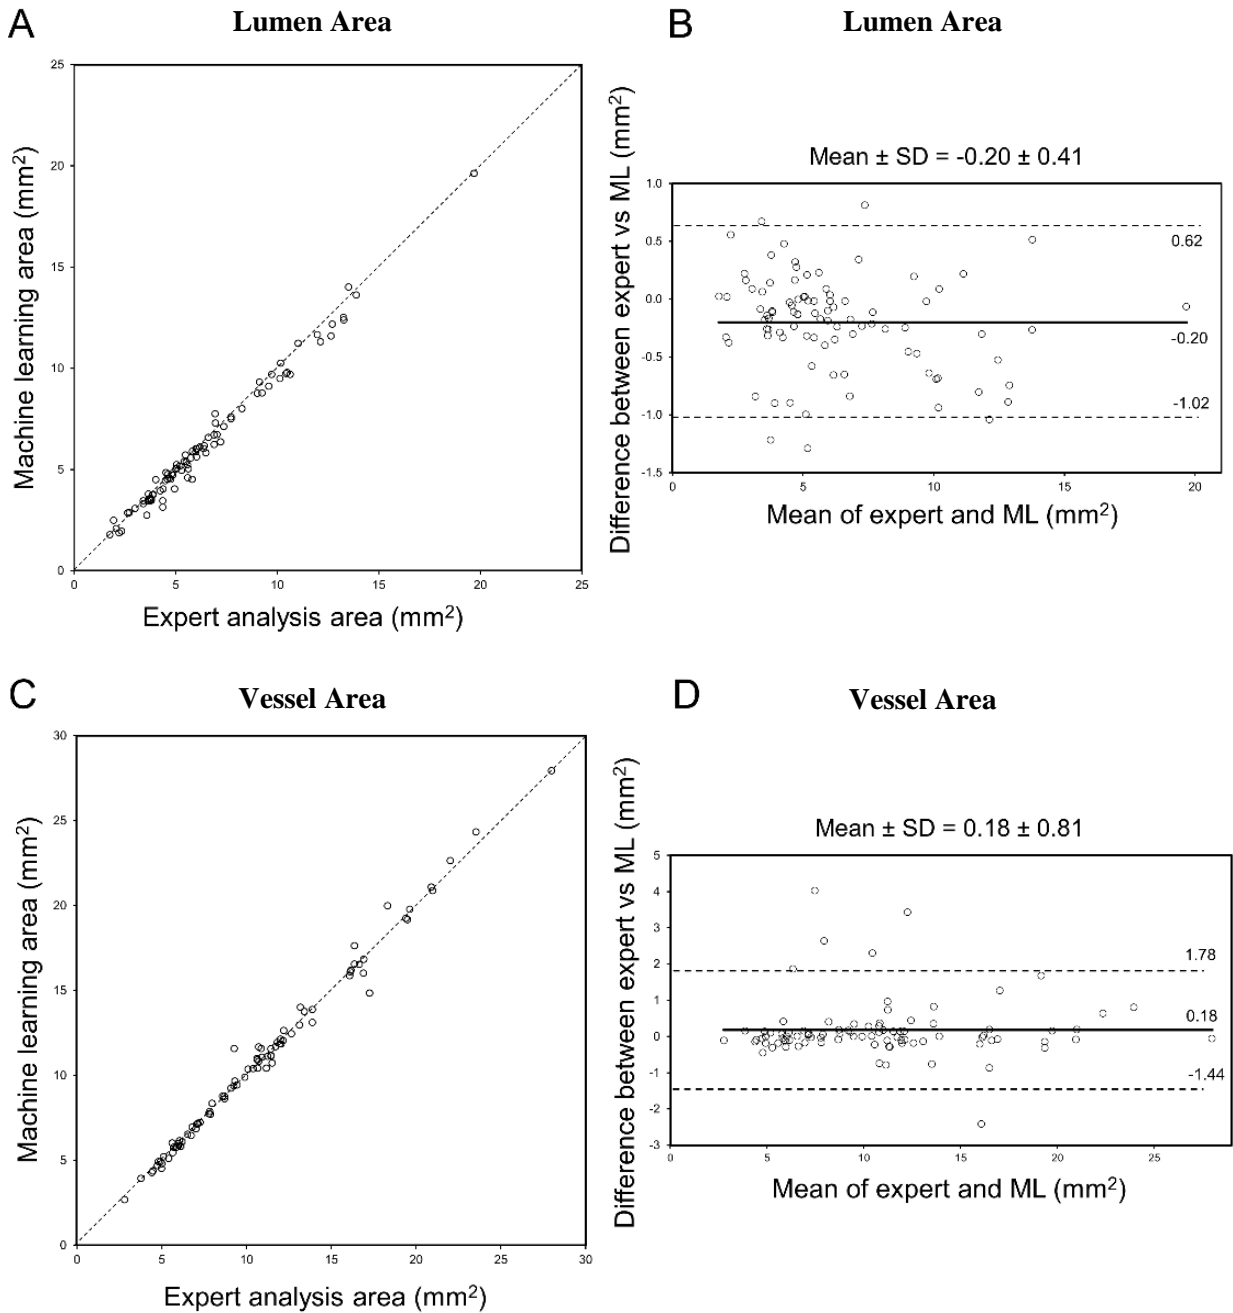

A) Correlation of lumen area. B) Bland-Altman plot of lumen area. Mean difference is shown in solid line and  $\pm 2\text{SD}$  of the difference are shown in dotted lines. C) Correlation of vessel area. D) Bland-Altman plot of vessel area. Mean difference is shown in solid line and  $\pm 2\text{SD}$  of the difference are shown in dotted. Abbreviation as in Supplemental Figure 1.
